# Supplementary material for: Monitoring of pesticide residues in crops irrigated with reclaimed water by a multiresidue method based on modified QuEChERS
Source: Royal Society of Chemistry journal article supplement (doi:10.1039/d1ay00845e), 2021-01-01

**Figure S1.** Location and distribution of the field-plot experiments

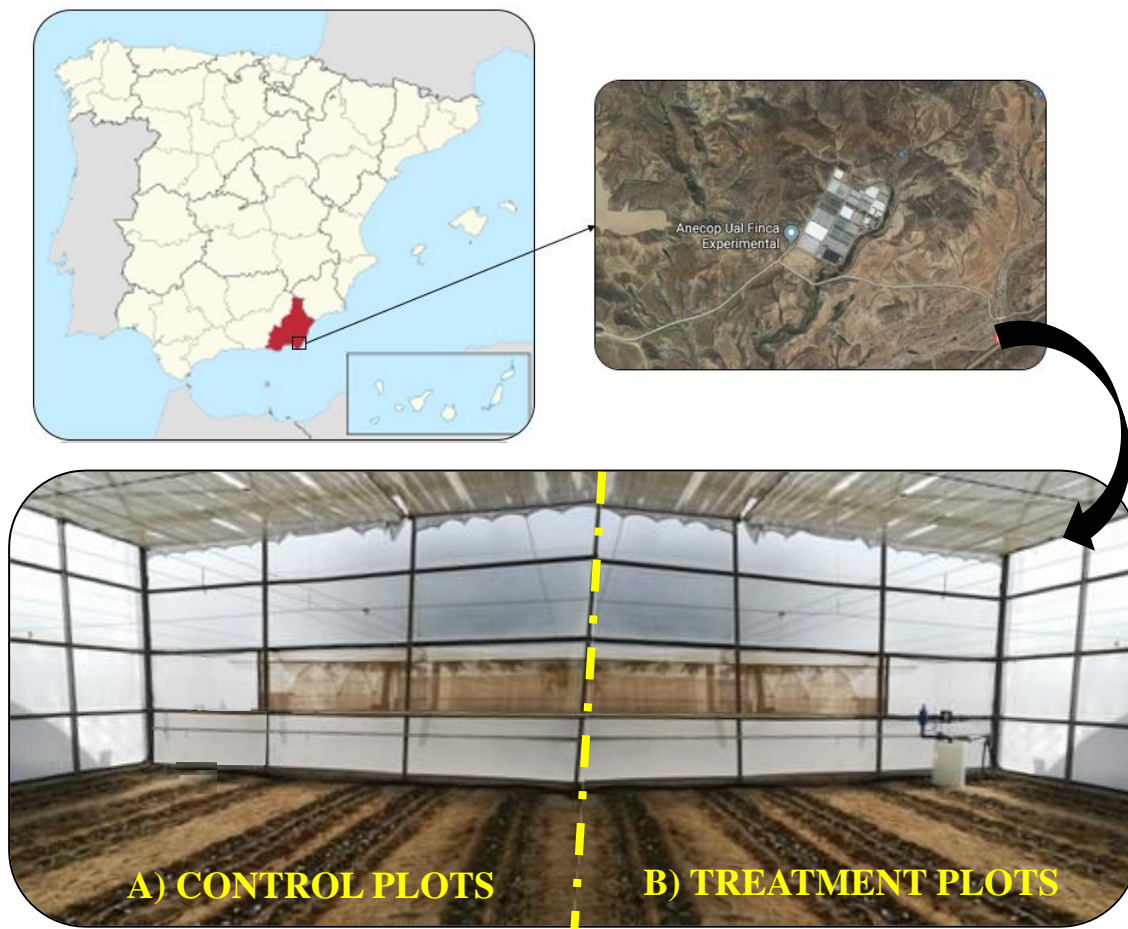

**Figure S2.** Accumulation of common pesticides detected in soil and plant (%)

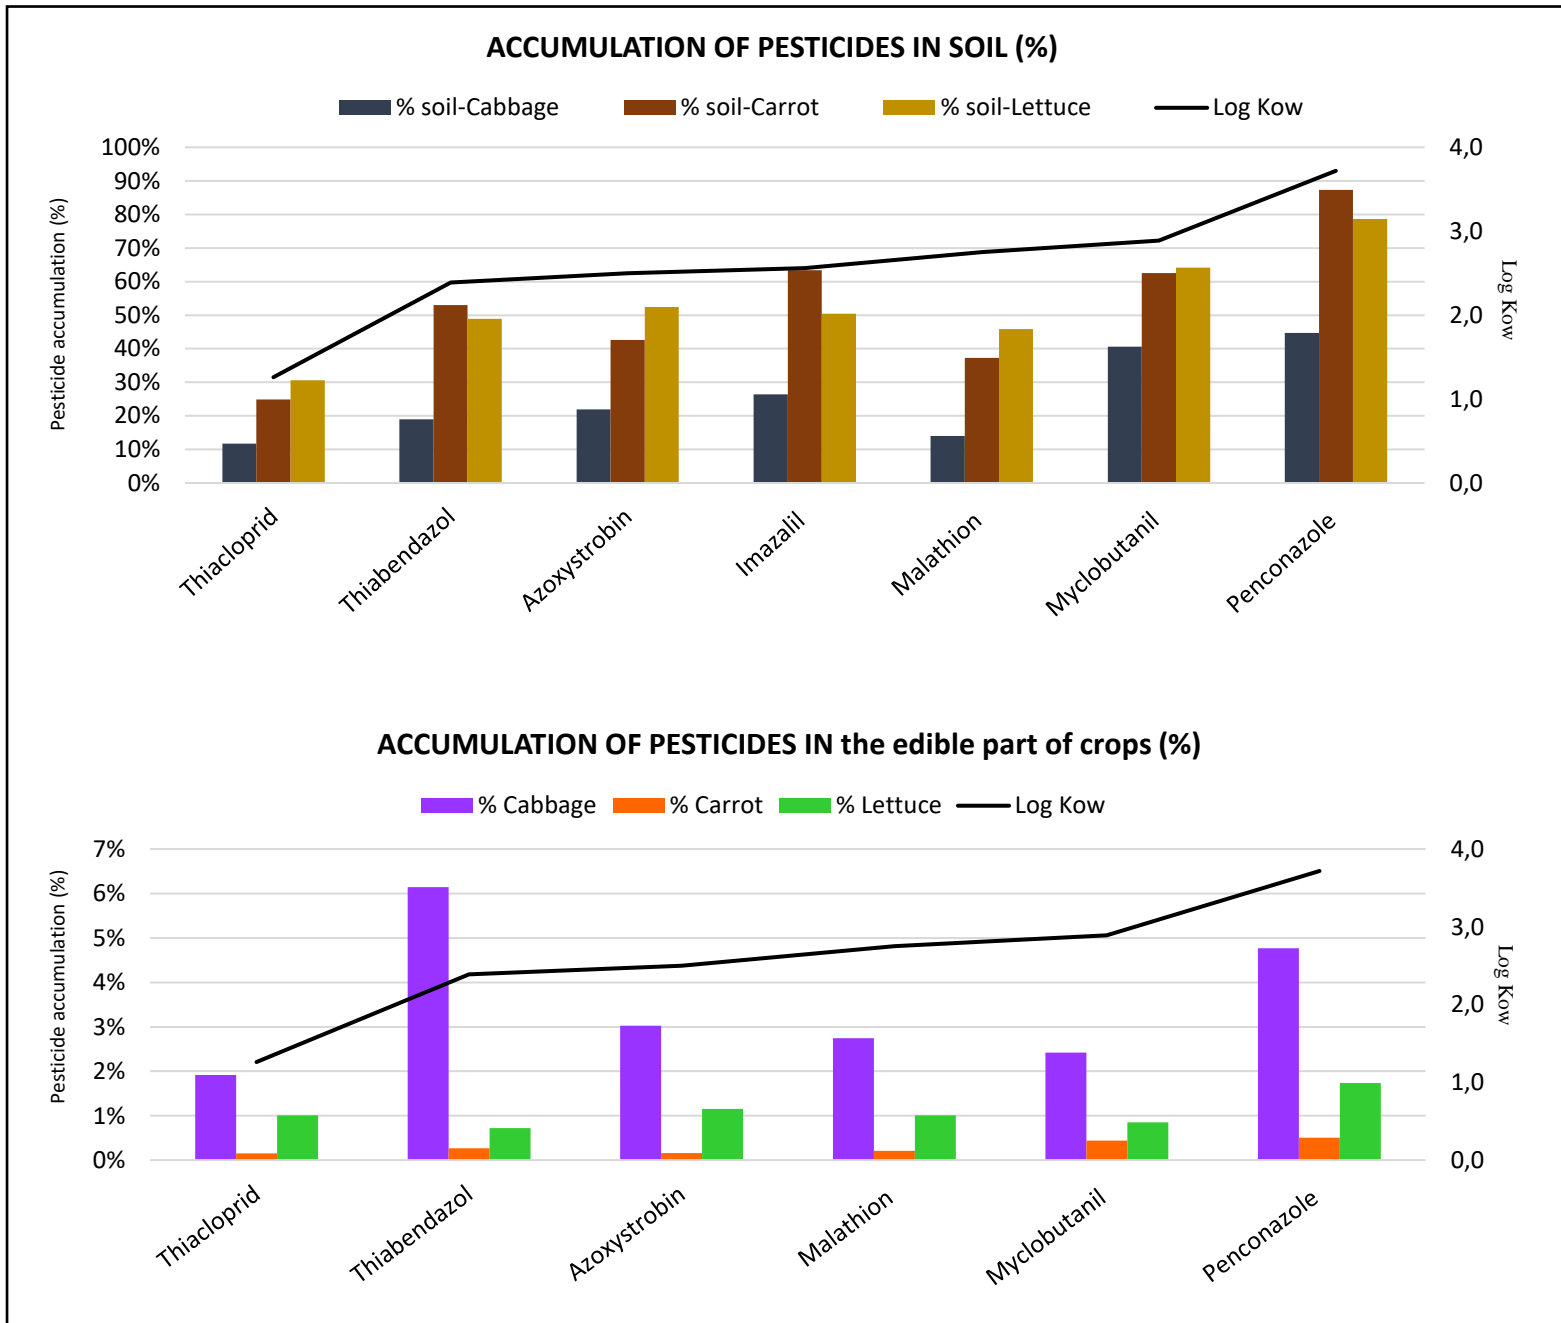

Supplement: d1ay00845e1.pdf [file d1ay00845e1.pdf]
